# Supplementary material for: Caffeine destabilizes preformed Aβ protofilaments: insights from all atom molecular dynamics simulations
Source: Royal Society of Chemistry journal article supplement (doi:10.1039/c9cp04162a), 2019-01-01
Supplement: c9cp04162a1.pdf [file c9cp04162a1.pdf]

## Supporting Information

### **Caffeine Destabilizes Preformed A $\beta$ Protofilament: Insights from All Atom Molecular Dynamics Simulations**

Shivani Gupta<sup>1</sup> and Ashok Kumar Dasmahapatra<sup>1,2\*</sup>

<sup>1</sup>Department of Chemical Engineering and <sup>2</sup>Center for Nanotechnology, Indian Institute of Technology Guwahati, Guwahati - 781039, Assam, India.

---

\* Corresponding author: Phone: +91-361-258-2273; Fax: +91-361-258-2291; Email address: [akdm@iitg.ac.in](mailto:akdm@iitg.ac.in)

Table S1- CFF.itp as obtained from SWISS-PARAM

| nr | type | resnr | resid | atom | cgnr | charge  | mass    |
|----|------|-------|-------|------|------|---------|---------|
| 1  | NPYL | 1     | LIG   | N1   | 1    | 0.0476  | 14.0067 |
| 2  | C5A  | 1     | LIG   | C2   | 2    | 0.0365  | 12.011  |
| 3  | N5B  | 1     | LIG   | N2   | 3    | -0.5653 | 14.0067 |
| 4  | C5B  | 1     | LIG   | C3   | 4    | 0.2902  | 12.011  |
| 5  | C5A  | 1     | LIG   | C4   | 5    | -0.2366 | 12.011  |
| 6  | C=O  | 1     | LIG   | C5   | 6    | 0.715   | 12.011  |
| 7  | NC=O | 1     | LIG   | N3   | 7    | -0.4201 | 14.0067 |
| 8  | C=O  | 1     | LIG   | C6   | 8    | 0.69    | 12.011  |
| 9  | NC=O | 1     | LIG   | N4   | 9    | -0.4231 | 14.0067 |
| 10 | CR   | 1     | LIG   | C1   | 10   | 0.2556  | 12.011  |
| 11 | O=C  | 1     | LIG   | O1   | 11   | -0.57   | 15.9994 |
| 12 | O=C  | 1     | LIG   | O2   | 12   | -0.57   | 15.9994 |
| 13 | CR   | 1     | LIG   | C7   | 13   | 0.3001  | 12.011  |
| 14 | CR   | 1     | LIG   | C8   | 14   | 0.3001  | 12.011  |
| 15 | HCMM | 1     | LIG   | H1   | 15   | 0       | 1.0079  |
| 16 | HCMM | 1     | LIG   | H2   | 16   | 0       | 1.0079  |
| 17 | HCMM | 1     | LIG   | H3   | 17   | 0       | 1.0079  |
| 18 | HCMM | 1     | LIG   | H4   | 18   | 0.15    | 1.0079  |
| 19 | HCMM | 1     | LIG   | H5   | 19   | 0       | 1.0079  |
| 20 | HCMM | 1     | LIG   | H6   | 20   | 0       | 1.0079  |
| 21 | HCMM | 1     | LIG   | H7   | 21   | 0       | 1.0079  |

|           |      |   |     |     |    |   |        |
|-----------|------|---|-----|-----|----|---|--------|
| <b>22</b> | HCMM | 1 | LIG | H7  | 22 | 0 | 1.0079 |
| <b>23</b> | HCMM | 1 | LIG | H9  | 23 | 0 | 1.0079 |
| <b>24</b> | HCMM | 1 | LIG | H10 | 24 | 0 | 1.0079 |

The topology file for the ligand has been retrieved from SWISS-PARAM which is readable by GROMACS. This helps in combining coordinates of protein and ligand together in one topology file for the simulation of Protein-Ligand complex.

Figure S1: Correlation between the theoretical and experimental NMR chemical shifts for C $\alpha$  and C $\beta$  atoms of A $\beta$ 42 protofibril structure is shown in panel a, and b, respectively. The unit of NMR chemical shift is ppm

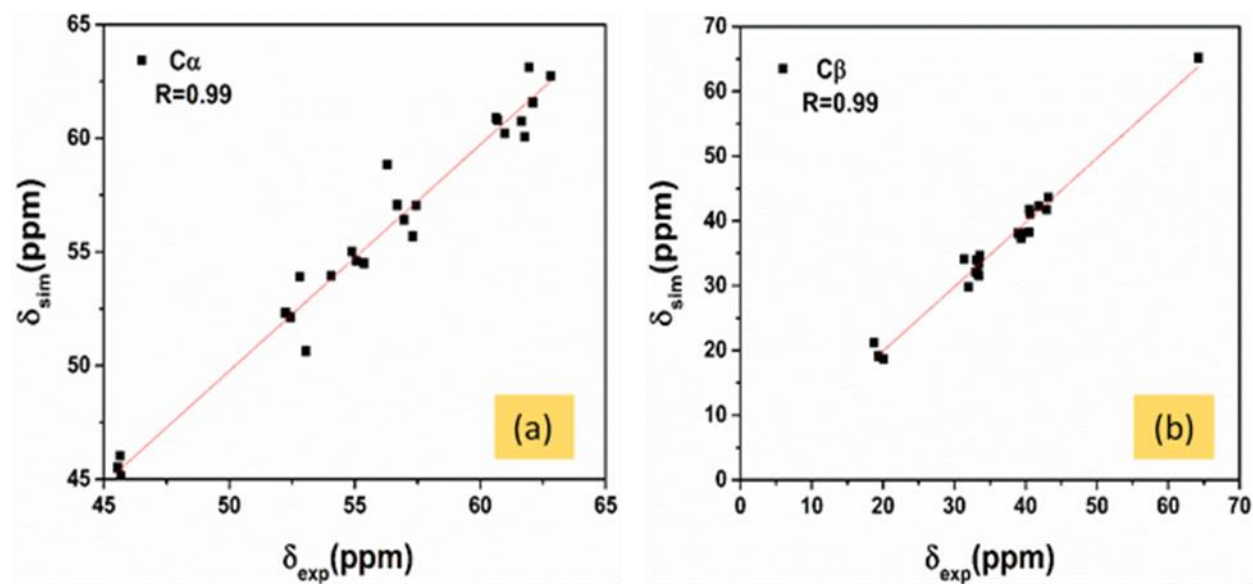

Figure S2: Comparison of simulated  $^3J_{\text{HN-H}\alpha}$  coupling constants of the A $\beta$ 42 residues (red) with experimental measurements

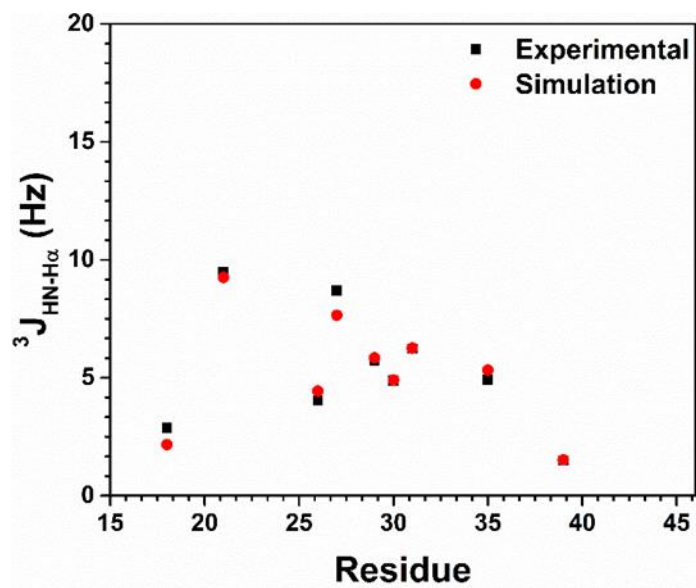

Figure S3: Statistical significance of all three simulation runs by Mean and standard deviation across  $R_g$  for all three sets in A $\beta$ -CFF for 100 ns.

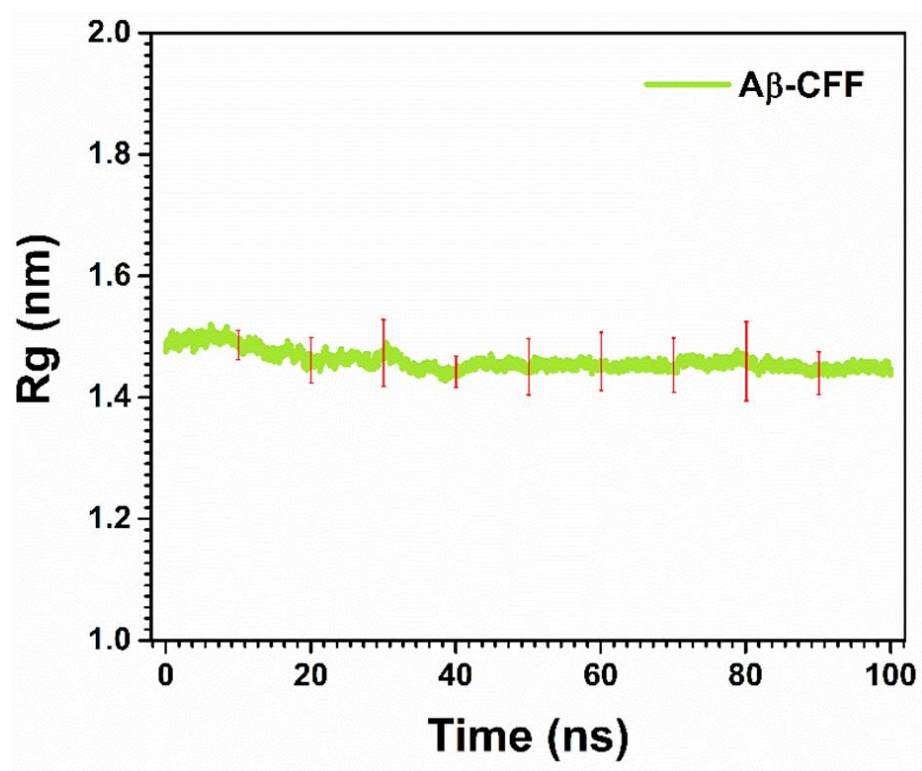

Table S2: Secondary structure component statistics for A $\beta$ <sub>17-42</sub> protofibril–Caffeine complex with three sets of simulations

The helix <sup>$\alpha$</sup>  is the sum of  $\alpha$ - and  $3_{10}$ - helices

| Secondary structure component(%)     | A $\beta$ <sub>17-42</sub> protofibril-Water (Average over 3 Sets) | A $\beta$ <sub>17-42</sub> protofibril-CFF complex (simulation 1) | A $\beta$ <sub>17-42</sub> protofibril-CFF complex (simulation 2) | A $\beta$ <sub>17-42</sub> protofibril-CFF complex (simulation 3) |
|--------------------------------------|--------------------------------------------------------------------|-------------------------------------------------------------------|-------------------------------------------------------------------|-------------------------------------------------------------------|
| Coil                                 | 31                                                                 | 37                                                                | 38                                                                | 44                                                                |
| $\beta$ -Sheet                       | 51                                                                 | 33                                                                | 44                                                                | 37                                                                |
| $\beta$ -Bridge                      | 1                                                                  | 4                                                                 | 3                                                                 | 3                                                                 |
| Bend                                 | 12                                                                 | 17                                                                | 11                                                                | 11                                                                |
| Turn                                 | 2                                                                  | 5                                                                 | 1                                                                 | 2                                                                 |
| Helix <sup><math>\alpha</math></sup> | 0                                                                  | 2                                                                 | 0                                                                 | 0                                                                 |
| Chain_Separation                     | 3                                                                  | 3                                                                 | 3                                                                 | 3                                                                 |

A movie showing destabilization effect of caffeine on A $\beta$  protofibril
